# Supplementary material
Source: publisher site journal article supplement (https://static.cambridge.org/content/id/urn:cambridge.org:id:article:S0899823X20000744/resource/name/S0899823X20000744supp001.docx)
Supplement: Supplementary file 1 [file S0899823X20000744supp001.docx]

**SUPPLEMENTAL MATERIAL**

**Table 1: Ciprofloxacin resistance results from 2014 - 2018**

| Organism | *Escherichia coli* | | | | | *Klebsiella pneumoniae* | | | | | *Pseudomonas aeruginosa* | | | | |
| --- | --- | --- | --- | --- | --- | --- | --- | --- | --- | --- | --- | --- | --- | --- | --- |
| Year | 2014 | 2015 | 2016 | 2017 | 2018 | 2014 | 2015 | 2016 | 2017 | 2018 | 2014 | 2015 | 2016 | 2017 | 2018 |
| Susceptible | 57.3% (1146/2000) | 56.4% (1040/1844) | 57.6% (991/1720) | 55.1% (937/1701) | 55.2% (906/1642) | 66.4% (841/1266) | 65.9% (789/1197) | 64.4% (743/1154) | 62.1% (724/1165) | 62.9% (696/1106) | 84.3% (788/935) | 84.0% (776/924) | 84.0% (639/761) | 86.4% (692/801) | 84.9% (632/744) |
| Intermediate | 2.8% (56/2000) | 3.7% (68/1844) | 3.5% (61/1720) | 3.5% (59/1701) | 4.4% (72/1642) | 4.5% (57/1266) | 5.8% (69/1197) | 4.5% (52/1154) | 3.2% (37/1165) | 4.9% (54/1106) | - | - | - | - | - |
| Resistant | 39.9% (798/2000) | 39.9% (736/1844) | 38.8% (668/1720) | 41.4% (705/1701) | 40.4% (664/1642) | 29.1% (368/1266) | 28.3% (339/1197) | 31.1% (359/1154) | 34.7% (404/1165) | 32.2% (356/1106) | 15.7% (147/935) | 16.0% (148/924) | 16.0% (122/761) | 13.6% (109/801) | 15.1% (112/744) |
